# Supplementary material
Source: PubMed Central journal article supplement (PMC3183496)
Supplement: supp_123.10.1732_056366FigS1.pdf [file supp_123.10.1732_056366FigS1.pdf]

|       |                                                                 |      |
|-------|-----------------------------------------------------------------|------|
| Dog   | MAGASVKVAVRVRPFNSREMSRDSKCI IQMSGSTTTIVNPKQPKETPKSFSFDYSYWSHT   | 60   |
| Human | MAGASVKVAVRVRPFNSREMSRDSKCI IQMSGSTTTIVNPKQPKETPKSFSFDYSYWSHT   | 60   |
| Dog   | SPEDINYASQKQVYRDI GEEMLQHAFEGYNVCI FAYGQTGAGKSYTMMGKQEKDQQGIIP  | 120  |
| Human | SPEDINYASQKQVYRDI GEEMLQHAFEGYNVCI FAYGQTGAGKSYTMMGKQEKDQQGIIP  | 120  |
| Dog   | QLCEDLFSRINDTTNDNMSYSVEVS YMEIYCERVRDLLNPKNKG NLRVREHPLLGPYVED  | 180  |
| Human | QLCEDLFSRINDTTNDNMSYSVEVS YMEIYCERVRDLLNPKNKG NLRVREHPLLGPYVED  | 180  |
| Dog   | LSKLAVTSYNDIQDLMDSGNKARTVAATNMNETSSRS HAVFNII FTQKRHDAETNITTEK  | 240  |
| Human | LSKLAVTSYNDIQDLMDSGNKARTVAATNMNETSSRS HAVFNII FTQKRHDAETNITTEK  | 240  |
| Dog   | VSKISLVDLAGSERADSTGAKGTRLKEGANINKSLTTLGKVISALAE MDSGPNKNNKKKKK  | 300  |
| Human | VSKISLVDLAGSERADSTGAKGTRLKEGANINKSLTTLGKVISALAE MDSGPNKNNKKKKK  | 300  |
| Dog   | TDFIPYRDSVLTWLLRENLGGNSRTAMVAALS PADINYDETLSTLRYADRAKQIRCNAVI   | 360  |
| Human | TDFIPYRDSVLTWLLRENLGGNSRTAMVAALS PADINYDETLSTLRYADRAKQIRCNAVI   | 360  |
| Dog   | NEDPNNKLIRELKDEVTRLRDL LLYAQGLGDITDMTNALVGMSPSSSL SALSSRAASVSSL | 420  |
| Human | NEDPNNKLIRELKDEVTRLRDL LLYAQGLGDITDMTNALVGMSPSSSL SALSSRAASVSSL | 420  |
| Dog   | HERILFAPGSEEAIERLKETEKIIAELNETWEEKLRRTEAIRMEREALLAEMGVAMREDG    | 480  |
| Human | HERILFAPGSEEAIERLKETEKIIAELNETWEEKLRRTEAIRMEREALLAEMGVAMREDG    | 480  |
| Dog   | GTLGVFSPKKT PHLVNLNEDPLMSECLLYYIKDGI TRVGREDAERRQDIVLSGHFIKEEH  | 540  |
| Human | GTLGVFSPKKT PHLVNLNEDPLMSECLLYYIKDGI TRVGREDCERRQDIVLSGHFIKEEH  | 540  |
| Dog   | CVFRSDSRGGSEAVVTLEPCEGADTYVNGKKVTEPSILRSGNRIIMGKSHVFRFNHPEQA    | 600  |
| Human | CVFRSDSRGGSEAVVTLEPCEGADTYVNGKKVTEPSILRSGNRIIMGKSHVFRFNHPEQA    | 600  |
| Dog   | RQERERTPCAETP XEPVDWAFQAQRELLEKQGIDMKQEMEQR LQELEDQYRREREATYLL  | 660  |
| Human | RQERERTPCAETP XEPVDWAFQAQRELLEKQGIDMKQEMEQR LQELEDQYRREREATYLL  | 660  |
| Dog   | EQQRLDYESKLEALQKQMSRYYPEVN EEEEEPEDEVQWTERECE LALWAFRKKWKYQFT   | 720  |
| Human | EQQRLDYESKLEALQKQMSRYYPEVN EEEEEPEDEVQWTERECE LALWAFRKKWKYQFT   | 720  |
| Dog   | SLRDLLWGNAIFLKEANAISVELKKKVQFQVLLTDTLYSPLPPDLLPPEAAK DRETRPF    | 780  |
| Human | SLRDLLWGNAIFLKEANAISVELKKKVQFQVLLTDTLYSPLPPDLLPPEAAK DRETRPF    | 780  |
| Dog   | PRTIVAVEVQDQKNGATHYWTLEKLRQRLDLMREMYDRAAEV PSSVIEDCDNVVTGGDPF   | 840  |
| Human | PRTIVAVEVQDQKNGATHYWTLEKLRQRLDLMREMYDRAAEV PSSVIEDCDNVVTGGDPF   | 840  |
| Dog   | YDRFPWFRLVGRAFYVLSNLLYPVPLVHRVA VVSEKGEVKGFLRVAVQA TSADEEAPDYG  | 900  |
| Human | YDRFPWFRLVGRAFYVLSNLLYPVPLVHRVA VVSEKGEVKGFLRVAVQA TSADEEAPDYG  | 900  |
| Dog   | SGVRQSGTAR ISFDDQHFEKFQSESCPVVGMRSRSGTSQEELRIVEGQGQGADTGPSADEV  | 960  |
| Human | SGVRQSGTAK ISFDDQHFEKFQSESCPVVGMRSRSGTSQEELRIVEGQGQGADVGPSADEV  | 960  |
| Dog   | NNNTCSAVPPEGLLLDS PEKAATDGPLDAALDHLRLGSTFTFRVTVLQASSISAEYADIF   | 1020 |
| Human | NNNTCSAVPPEGLLLDS PEKAALDGPLDAALDHLRLGNTFTFRVTVLQASSISAEYADIF   | 1020 |
| Dog   | CQFNFIHRHDEAFSTEPLKNTGRGPP LGGFYHVQNI AVEVTKSFIEYIKSQPIVFEVFGHY | 1080 |
| Human | CQFNFIHRHDEAFSTEPLKNTGRGPP LGGFYHVQNI AVEVTKSFIEYIKSQPIVFEVFGHY | 1080 |
| Dog   | QQHPFPPLCKDVLSPLRPSRRHFPRVMPLSKPVPATKLSTL ARPCEGPGCHCKYDLLVYFE  | 1140 |
| Human | QQHPFPPLCKDVLSPLRPSRRHFPRVMPLSKPVPATKLSTL ARPCEGPGCHCKYDLLVYFE  | 1140 |

Dog ICELEANGDYIPAVVDHRGGMPCMGTFLLHQGIQRRITVTL LHETGSHIRWKEVRELVVG 1200  
Human ICELEANGDYIPAVVDHRGGMPCMGTFLLHQGIQRRITVTL LHETGSHIRWKEVRELVVG 1200

Dog RIRNTPETDESLIDPNILSLNILSSDYIHPAQDDRTFYQFEAAWDSSMHNLLLLNRVTPY 1260  
Human RIRNTPETDESLIDPNILSLNILSSGYIHPAQDDRTFYQFEAAWDSSMHNLLLLNRVTPY 1260

Dog REKIYMTLSAYIEMENCTQPAVITKDFCMVFYSRDAKLPASRSIRNLF GSGSLRASESNR 1320  
Human REKIYMTLSAYIEMENCTQPAVVTKDFCMVFYSRDAKLPASRSIRNLF GSGSLRASESNR 1320

Dog VTGVYELSLCHVADAGSPGMQRRRRRVLDTSVAYVRGEENLAGWRPRSDSLILDHQWELE 1380  
Human VTGVYELSLCHVADAGSPGMQRRRRRVLDTSVAYVRGEENLAGWRPRSDSLILDHQWELE 1380

Dog KLSLLQEVKTRHYLLREKLETQRP GPEAPSPASSED LGSHGSSSPSSPLSAEGRPSP 1440  
Human KLSLLQEVKTRHYLLREKLETAQRVPPEALSPA FSEDS ESHGSSAS SPSPLSAEGRPSP 1440

Dog LETPNERQRELAVKCLRLLTHTFNREYTHSHVCI SASESKLSEMSVTL LRDPMSPLGAA 1500  
Human LEAPNERQRELAVKCLRLLTHTFNREYTHSHVCV SASESKLSEMSVTL LRDPMSPLGVA 1500

Dog TLTPSSTCPSLVEGRYGA AE LRTPQPCSRPASPEPE PVPEADSKKLPSPARAAEADKEPQ 1560  
Human TLTPSSTCPSLVEGRYGATDLRTPQPCSRPASPEPE LLPEADSKKLPSPARATETDKEPQ 1560

Dog RLLVPDIQEIRVSPIVSKKGYLHFLEPHTAGWAKRFV VRRPYAYLYNSDKDSVERFVLN 1620  
Human RLLVPDIQEIRVSPIVSKKGYLHFLEPHTSGWARRFV VRRPYAYMYNSDKD TVERFVLN 1620

Dog LSTAQVEYSEDQQAMLKTPNTFAVCTEHRGILLQANSDKMDHDWLYAFN PLLAGTIRSKL 1680  
Human LATAQVEYSEDQQAMLKTPNTFAVCTEHRGILLQA ASDKMDHDWLYAFN PLLAGTIRSKL 1680

Dog SRRRSAQMRV 1690  
Human SRRRSAQMRV 1690
