# Supplementary material
Source: PubMed Central journal article supplement (PMC3183496)

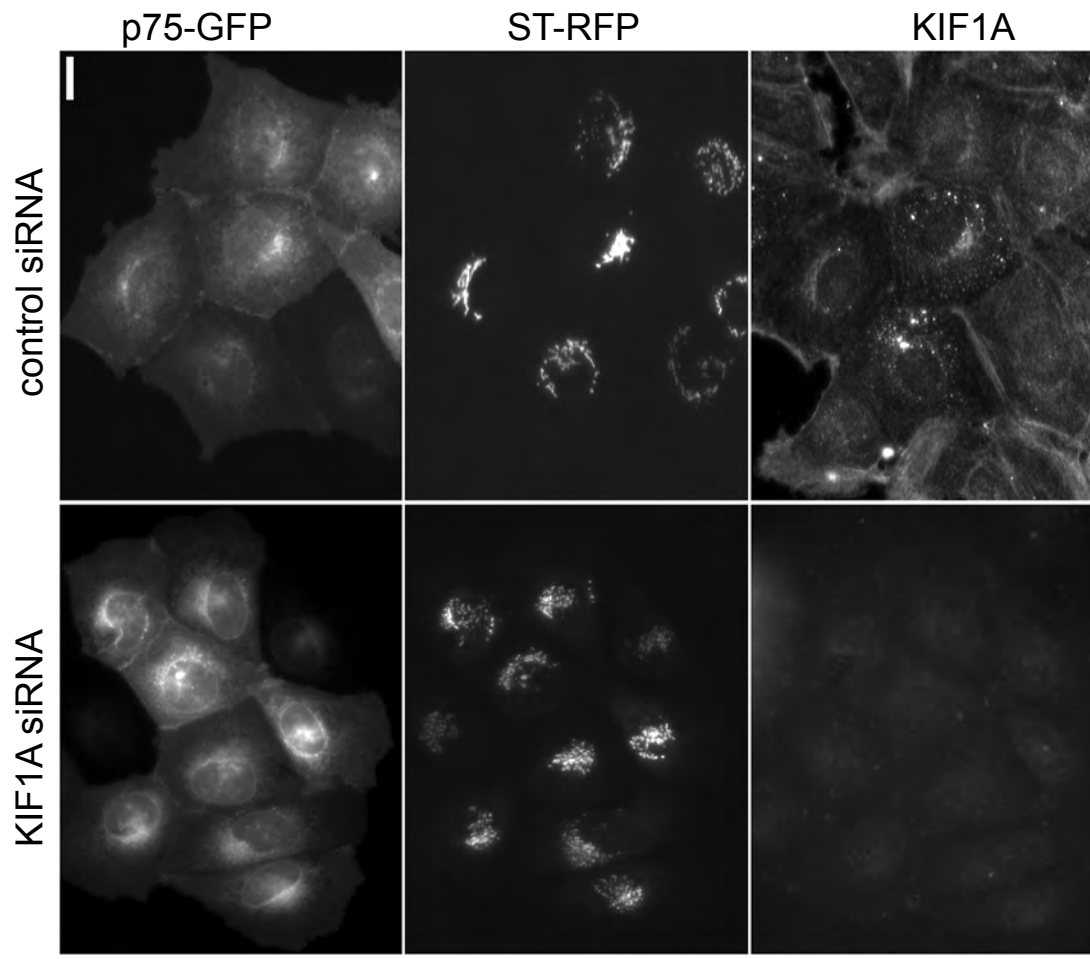

Supplement: supp_123.10.1732_056366FigS2.pdf [file supp_123.10.1732_056366FigS2.pdf]

A

siRNA Control

siRNA KIF1A

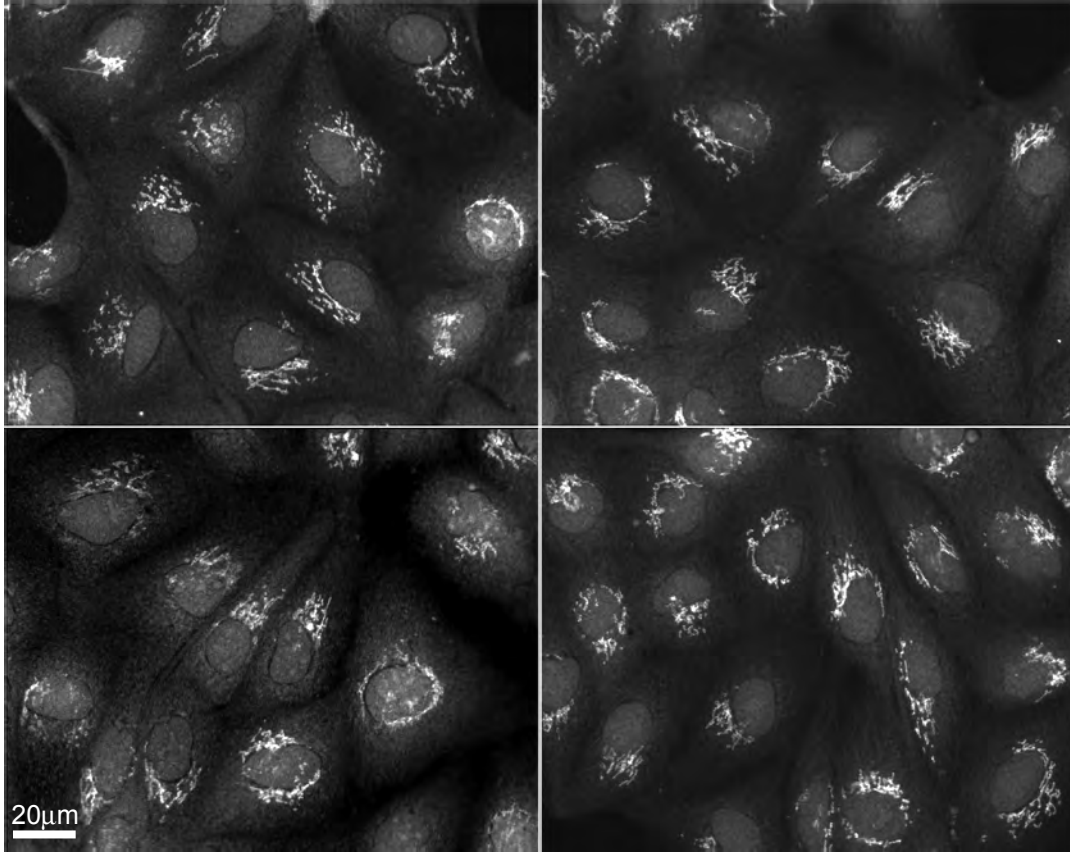

B

myc-KIF1A-tail injected

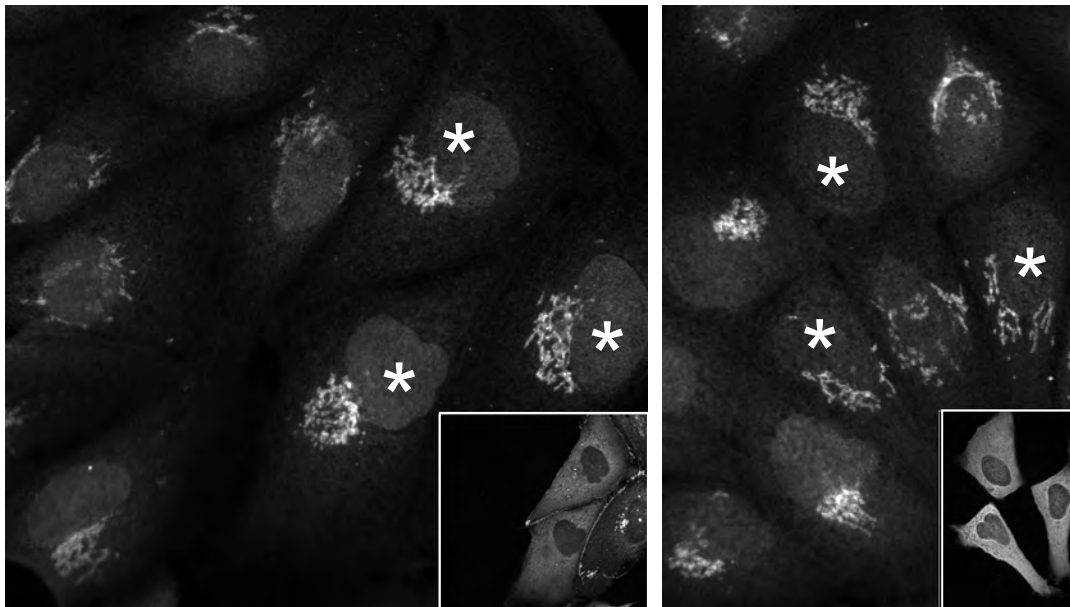

Supplement: supp_123.10.1732_056366FigS3.pdf [file supp_123.10.1732_056366FigS3.pdf]

GPI-GFP + ST-RFP (insets)

5m 37°C

155m 37°C

control siRNA

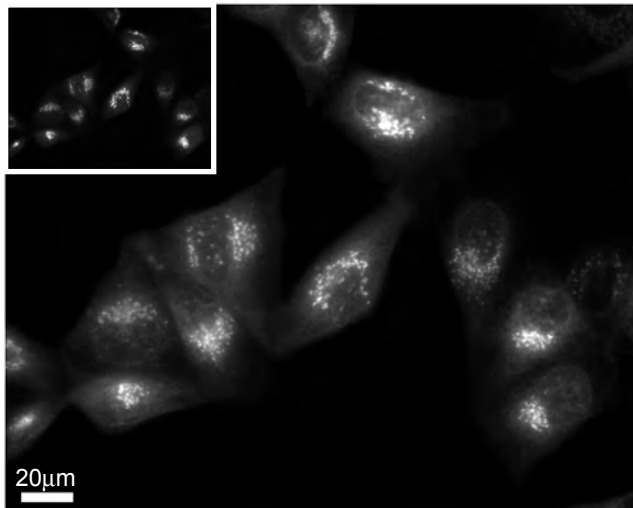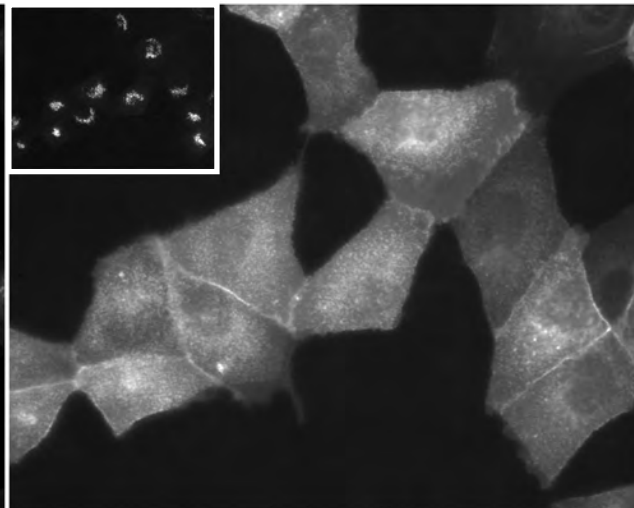

KIF1A siRNA

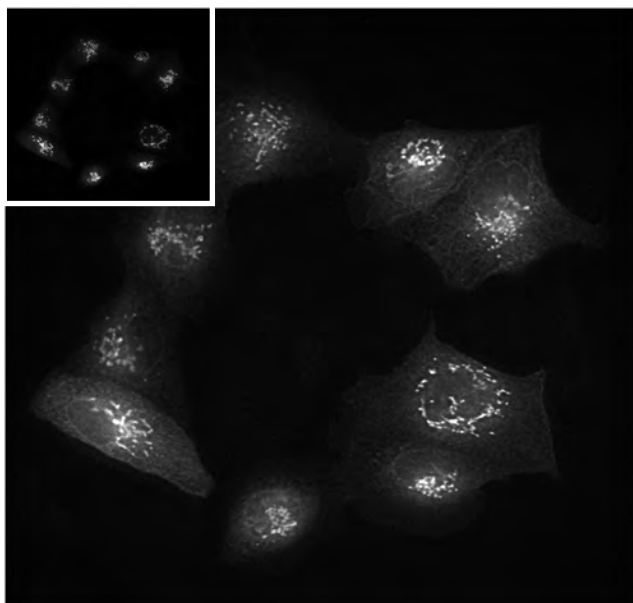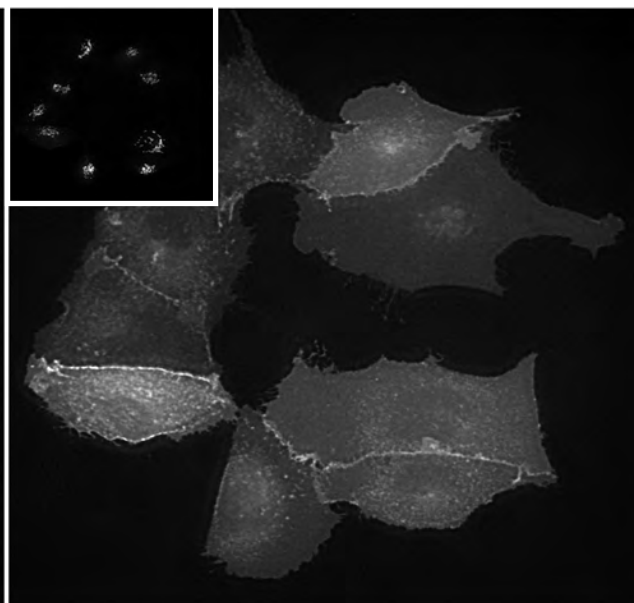

Supplement: supp_123.10.1732_056366FigS4.pdf [file supp_123.10.1732_056366FigS4.pdf]

p75-GFP + mRFP-KIF1C-ML

5m 37°C

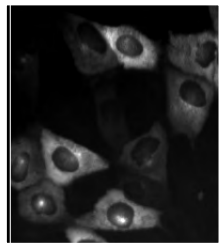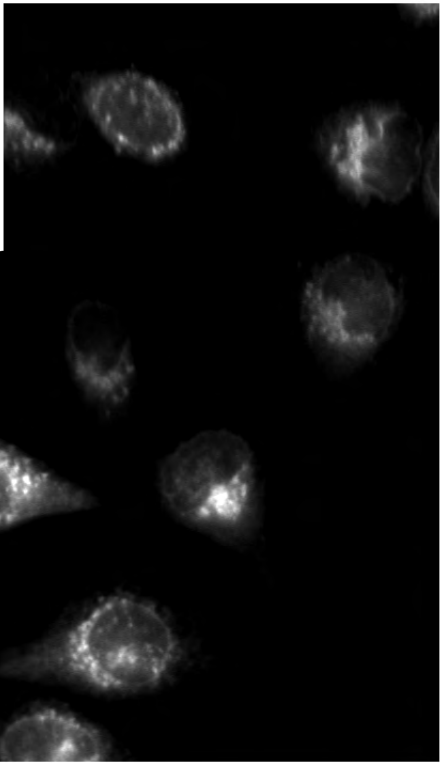

245m 37°C

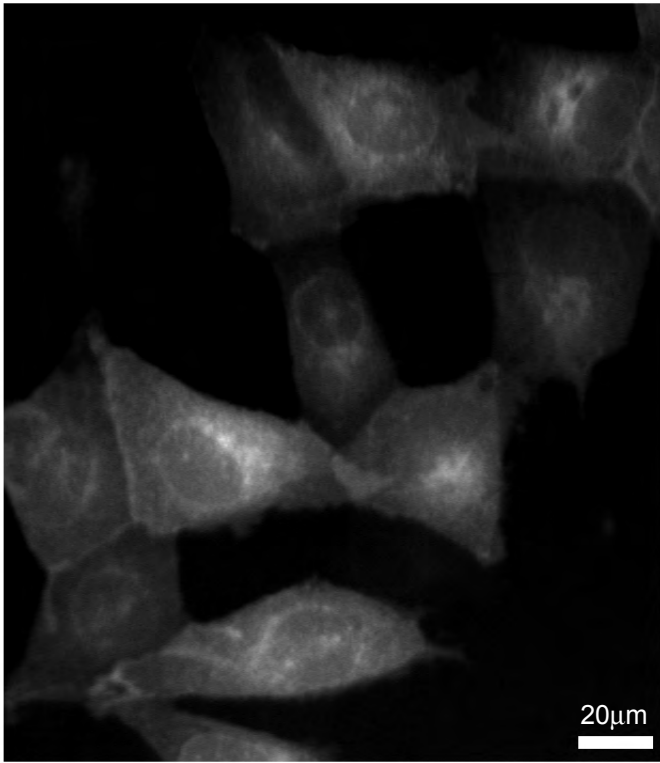

Supplement: supp_123.10.1732_056366FigS5.pdf [file supp_123.10.1732_056366FigS5.pdf]
